# Supplementary material
Source: PubMed Central journal article supplement (PMC3318507)
Supplement: supp_50.4.1289_JCM-JCM06269-11-s01.pdf [file supp_50.4.1289_JCM-JCM06269-11-s01.pdf]

Table S1. Results from in-silico search for variant primer binding sites for the poly-I and 3'-end segments of the DP016S primers

PRIMERS: 16SDPO-Forward 16SDPO-Reverse  
poly-I + 3'-segment: IIIIIAACGCT GCYAAITIII (Reverse-inverted; Y=T/C)

| Bacterial species                     | GenBank accession* |       |                              |
|---------------------------------------|--------------------|-------|------------------------------|
| Abiotrophia defectiva                 | AY879307           | ----- | -----                        |
| Achromobacter xylosoxidans            | CP002287           | ----- | -----                        |
| Acidaminococcus fermentans            | CP001859           | ----- | -----                        |
| Acinetobacter baumannii               | CP000521           | ----- | -----                        |
| Acinetobacter calcoaceticus           | AJ888984           | ----- | -----                        |
| Actinobacillus pleuropneumoniae       | CP000569           | ----- | -----                        |
| Actinobaculum schaalii                | EF151127           | ----- | -----                        |
| Actinomyces europaeus                 | NR_026363          | ----- | -----                        |
| Actinomyces meyeri                    | AF457639           | ----- | -----                        |
| Actionobacillus actinomycetemcomitans | NR_029171          | ----- | -----                        |
| Adlercreutzia equolifaciens           | AB306661           | ----- | -----                        |
| Aerococcus urinae                     | U64458             | ----- | -----                        |
| Aeromonas hydrophila                  | CP000462           | ----- | -----                        |
| Agrobacterium tumefaciens             | AE007870           | ----- | -----                        |
| Alcaligenes faecalis                  | AY548384           | ----- | -----                        |
| Allistipes shahii                     | AB554233           | ----- | -----                        |
| Alloscardovia omnicolens              | AJ278695           | ----- | -----                        |
| Anaerococcus prevotii                 | CP001708           | ----- | -----                        |
| Anaerococcus vaginalis                | D14146             | ----- | -----                        |
| <b>Anaplasma phagocytophilum</b>      | <b>CP000235</b>    | ----- | <b>--A----- ONE MISMATCH</b> |
| Arcanobacterium pyogenes              | EU268191           | ----- | -----                        |
| Atopobium parvulum                    | CP001721           | ----- | -----                        |
| Bacillus cereus                       | CP001407           | ----- | -----                        |
| Bacillus subtilis                     | AL009126           | ----- | -----                        |
| Bacteroides fragilis                  | AP006841           | ----- | -----                        |
| Bacteroides vulgatus                  | CP000139           | ----- | -----                        |
| Bartonella henselae                   | BX897699           | ----- | -----                        |
| Bergeriella denitificans              | AB087265           | ----- | -----                        |
| Bifidobacterium adolescentis          | AP009256           | ----- | -----                        |
| Bifidobacterium longum                | CP001095           | ----- | -----                        |
| Bordetella bronchiseptica             | BX640449           | ----- | -----                        |
| Bordetella pertussis                  | BX640420           | ----- | -----                        |
| Borrelia burgorferi                   | CP001205           | ----- | -----                        |
| Brevibacillus brevis                  | AP008955           | ----- | -----                        |
| Brucella melitensis                   | CP001488           | ----- | -----                        |
| Burkholderia multivorans              | AP009386           | ----- | -----                        |
| Burkholderia pseudomallei             | CP000571           | ----- | -----                        |
| Campylobacter gracilis                | L04320             | ----- | -----                        |
| Campylobacter jejuni                  | AL111168           | ----- | -----                        |
| Campylobacter lari                    | CP000932           | ----- | -----                        |
| Capnocytophaga gingivalis             | NR_026094          | ----- | -----                        |
| Catonella sp.                         | AF385577           | ----- | -----                        |
| Chlamydia trachomatis                 | CP000051           | ----- | -----                        |
| Chlamydomydia pneumoniae              | AE001363           | ----- | -----                        |
| Chryseobacterium hominis              | AM261868           | ----- | -----                        |

|                                    |                  |       |                              |
|------------------------------------|------------------|-------|------------------------------|
| Citrobacter koseri                 | CP000822         | ----- | -----                        |
| Clostridium boltae                 | NR_025567        | ----- | -----                        |
| Clostridium botulinum              | CP000726         | ----- | -----                        |
| Clostridium perfringens            | AB045283         | ----- | -----                        |
| Clostridium septicum               | NR_026020        | ----- | -----                        |
| Collinsella stercooris             | NR_027527        | ----- | -----                        |
| Corynebacterium jeikeium           | CR931997         | ----- | -----                        |
| Corynebacterium tuberculostearicum | NR_028975        | ----- | -----                        |
| Coxiella burnetii                  | CP001019         | ----- | -----                        |
| Cronobacter sakazakii              | CP000783         | ----- | -----                        |
| Delftia acidovorans                | CP000884         | ----- | -----                        |
| Dermabacter hominis                | X91034           | ----- | -----                        |
| Desulfovibrio desulfuricans        | AF192153         | ----- | -----                        |
| Desulfovibrio pigra                | AF192152         | ----- | -----                        |
| Dialister microaerophilus          | AY958874         | ----- | -----                        |
| Dialister pneumosintes             | Z36297           | ----- | -----                        |
| Dietzia schimae                    | NR_044482        | ----- | -----                        |
| Dysgonomonas gadei                 | NR_026505        | ----- | -----                        |
| Edwardsiella ictaluri              | CP001600         | ----- | -----                        |
| Eggerthella lenta                  | CP001726         | ----- | -----                        |
| <b>Ehrlichia chaffeensis</b>       | <b>CP000236</b>  | ----- | <b>--A----- ONE MISMATCH</b> |
| <b>Ehrlichia ewingii</b>           | <b>NR_044747</b> | ----- | <b>--A----- ONE MISMATCH</b> |
| Eikenella corrodens                | GQ422740         | ----- | -----                        |
| Enterobacter cloacae               | FP929040         | ----- | -----                        |
| Enterococcus faecalis              | AJ420803         | ----- | -----                        |
| Erysipelotrix rhusiopathiae        | AB055908         | ----- | -----                        |
| Escherichiae coli                  | CP001509         | ----- | -----                        |
| Eubacterium brachy                 | NR_036993        | ----- | -----                        |
| Facklamia ignava                   | NR_026447        | ----- | -----                        |
| Facklamia miroungae                | NR_025400        | ----- | -----                        |
| Finegoldia magna                   | AP008971         | ----- | -----                        |
| Flavobacterium johnsoniae          | CP000685         | ----- | -----                        |
| Flexispira rappini                 | AY192528         | ----- | -----                        |
| Francisella tularensis             | AM286280         | ----- | -----                        |
| Fusobacterium necrophorum          | AM905356         | ----- | -----                        |
| Fusobacterium nucleatum            | AE009951         | ----- | -----                        |
| Gemella haemolysans                | NR_025903        | ----- | -----                        |
| Gemella morbillorum                | NR_025904        | ----- | -----                        |
| Gordonia bronchialis               | AB472842         | ----- | -----                        |
| Gordonia terrae                    | AB355992         | ----- | -----                        |
| Granulicatella adjacens            | NR_025862        | ----- | -----                        |
| Haemophilus ducrey                 | AE017143         | ----- | -----                        |
| Haemophilus influenzae             | AF224305         | ----- | -----                        |
| Hafnia alvei                       | FJ971884         | ----- | -----                        |
| Helicobacter pylori                | U01330           | ----- | -----                        |
| <b>Jonquetella anthropi</b>        | <b>FJ577258</b>  | ----- | <b>--A----- ONE MISMATCH</b> |
| Kingella kingae                    | AY551999         | ----- | -----                        |
| Klebsiella pneumoniae              | CP000964         | ----- | -----                        |
| Klyuvera ascorbata                 | AF176559         | ----- | -----                        |
| Kocuria kristinae                  | NR_026199        | ----- | -----                        |

|                                      |           |       |       |
|--------------------------------------|-----------|-------|-------|
| <i>Lactobacillus casei</i>           | CP000423  | ----- | ----- |
| <i>Lactobacillus gasseri</i>         | AF519171  | ----- | ----- |
| <i>Lactococcus lactis</i>            | AE006456  | ----- | ----- |
| <i>Legionella pneumophila</i>        | CP000675  | ----- | ----- |
| <i>Leptospira biflexa</i>            | CP000777  | ----- | ----- |
| <i>Leptospira borgpetersenii</i>     | CP000348  | ----- | ----- |
| <i>Leptotrichia goodfellowii</i>     | NR_025649 | ----- | ----- |
| <i>Leptotrichia wadei</i>            | AY029802  | ----- | ----- |
| <i>Leuconostoc mesenteroides</i>     | FJ655776  | ----- | ----- |
| <i>Listeria monocytogenes</i>        | AL591981  | ----- | ----- |
| <i>Microbacterium laevaniformans</i> | EU879962  | ----- | ----- |
| <i>Micrococcus luteus</i>            | CP001628  | ----- | ----- |
| <i>Mobiluncus curtisii</i>           | AJ576084  | ----- | ----- |
| <i>Mogibacterium timidum</i>         | Z36296    | ----- | ----- |
| <i>Moraxella catarrhalis</i>         | AF192341  | ----- | ----- |
| <i>Moraxella nonliquefaciens</i>     | EF611819  | ----- | ----- |
| <i>Mycobacterium avium</i>           | CP000479  | ----- | ----- |
| <i>Mycobacterium tuberculosis</i>    | X58890    | ----- | ----- |
| <i>Mycobacterium ulcerans</i>        | CP000325  | ----- | ----- |
| <i>Mycoplasma hominis</i>            | AF443616  | ----- | ----- |
| <i>Neisseria gonorrhoeae</i>         | CP001050  | ----- | ----- |
| <i>Neisseria meningitidis</i>        | CP001561  | ----- | ----- |
| <i>Neorickettsia sennetu</i>         | CP000237  | ----- | ----- |
| <i>Nocardia cyriacigeorgica</i>      | EF127493  | ----- | ----- |
| <i>Nocardia farcinica</i>            | AP006618  | ----- | ----- |
| <i>Odoribacter splanchnicus</i>      | AB547649  | ----- | ----- |
| <i>Olsenella sp</i>                  | EU592964  | ----- | ----- |
| <i>Pantoea agglomerans</i>           | AF373196  | ----- | ----- |
| <i>Parabacteroides gordonii</i>      | AB470345  | ----- | ----- |
| <i>Paracoccus yeiii</i>              | AY014179  | ----- | ----- |
| <i>Parvimonas micra</i>              | D14143    | ----- | ----- |
| <i>Pasteurella multocida</i>         | AE006065  | ----- | ----- |
| <i>Pedobacter piscium</i>            | NR_025536 | ----- | ----- |
| <i>Peptoniphilus indolicus</i>       | D14147    | ----- | ----- |
| <i>Peptostreptococcus stomatis</i>   | GQ422715  | ----- | ----- |
| <i>Plesiomonas shigelloides</i>      | X74688    | ----- | ----- |
| <i>Porphyromonas endodontalis</i>    | L16491    | ----- | ----- |
| <i>Prevotella oris</i>               | GQ131410  | ----- | ----- |
| <i>Propionibacterium acnes</i>       | AB042288  | ----- | ----- |
| <i>Proteus mirabilis</i>             | AF008582  | ----- | ----- |
| <i>Providencia stuartii</i>          | NR_024848 | ----- | ----- |
| <i>Pseudomonas aeruginosa</i>        | AE004091  | ----- | ----- |
| <i>Ralstonia mannitolilytica</i>     | AY043378  | ----- | ----- |
| <i>Raoltella ornithinolytica</i>     | U78182    | ----- | ----- |
| <i>Rhodococcus equi</i>              | DQ150573  | ----- | ----- |
| <i>Rickettsia akari</i>              | CP000847  | ----- | ----- |
| <i>Rothia mucilaginosa</i>           | DQ409140  | ----- | ----- |
| <i>Rothia mucilaginosa</i>           | X87758    | ----- | ----- |
| <i>Ruminococcus gnavus</i>           | L76597    | ----- | ----- |
| <i>Serratia marcesens</i>            | AB061685  | ----- | ----- |

|                                      |           |       |       |
|--------------------------------------|-----------|-------|-------|
| <i>Shewanella putrefaciens</i>       | CP000681  | ----- | ----- |
| <i>Shuttleworthia satelles</i>       | AF399956  | ----- | ----- |
| <i>Sneathia sanguinegenes</i>        | NR_025487 | ----- | ----- |
| <i>Solobacterium moorei</i>          | GU470839  | ----- | ----- |
| <i>Sphingobacterium spiritivorum</i> | M58778    | ----- | ----- |
| <i>Sphingomonas paucimobilis</i>     | D13725    | ----- | ----- |
| <i>Staphylococcus aureus</i>         | NC_002953 | ----- | ----- |
| <i>Staphylococcus caprae</i>         | NR_024665 | ----- | ----- |
| <i>Staphylococcus haemolyticus</i>   | AP006716  | ----- | ----- |
| <i>Stenotrophomonas maltophilia</i>  | AB294557  | ----- | ----- |
| <i>Streptococcus agalactiae</i>      | CP000114  | ----- | ----- |
| <i>Streptococcus anginosus</i>       | AF145239  | ----- | ----- |
| <i>Streptococcus parasanguinis</i>   | NR_024842 | ----- | ----- |
| <i>Streptococcus pneumoniae</i>      | CP000918  | ----- | ----- |
| <i>Streptococcus sanguinis</i>       | CP000387  | ----- | ----- |
| <i>Sutterella wadsworthensis</i>     | FJ368987  | ----- | ----- |
| <i>Tannerella forsythensis</i>       | AB035460  | ----- | ----- |
| <i>Treponema scoranscii</i>          | NR_028690 | ----- | ----- |
| <i>Tropheryma whipplei</i>           | AE014184  | ----- | ----- |
| <i>Tsukamurella strandjordii</i>     | NR_025113 | ----- | ----- |
| <i>Ureaplasma urealyticum</i>        | CP001184  | ----- | ----- |
| <i>Veilonella dispar</i>             | AY995770  | ----- | ----- |
| <i>Vibrio parahaemolyticus</i>       | BA000031  | ----- | ----- |
| <i>Yersinia pestis</i>               | AL590842  | ----- | ----- |

\*Accessions used for validation of poly-I + 3'-segments. For 5'-segments other references might have been used.
